# Supplementary material for: Comparable Number of Genes Having Experienced Positive Selection among Great Ape Species
Source: MDPI journal article supplement (doi:10.3390/ani11113264), 2021-11-15
Supplement: s1 [file s1]

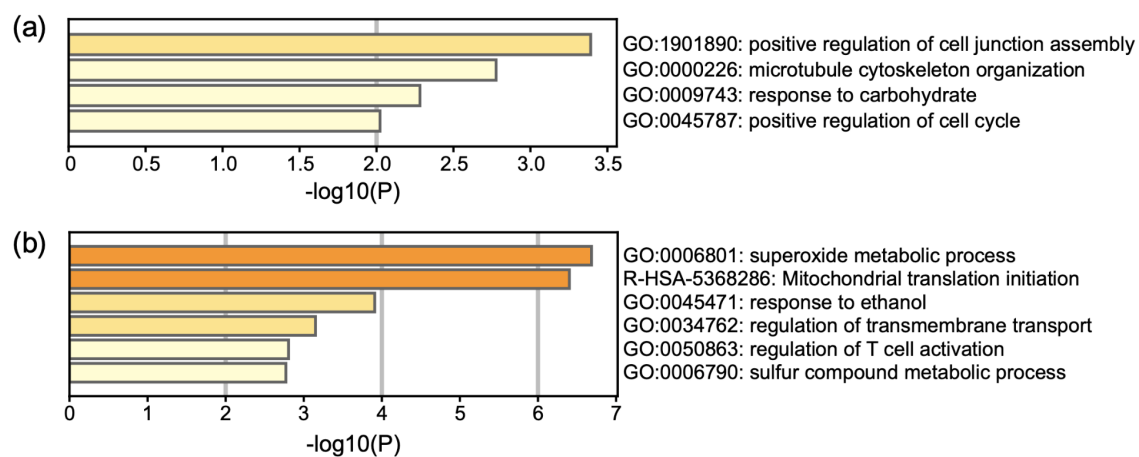

**Figure S2.** Functional enrichment for PSGs in (a) the human and (b) the common ancestor of the great ape.

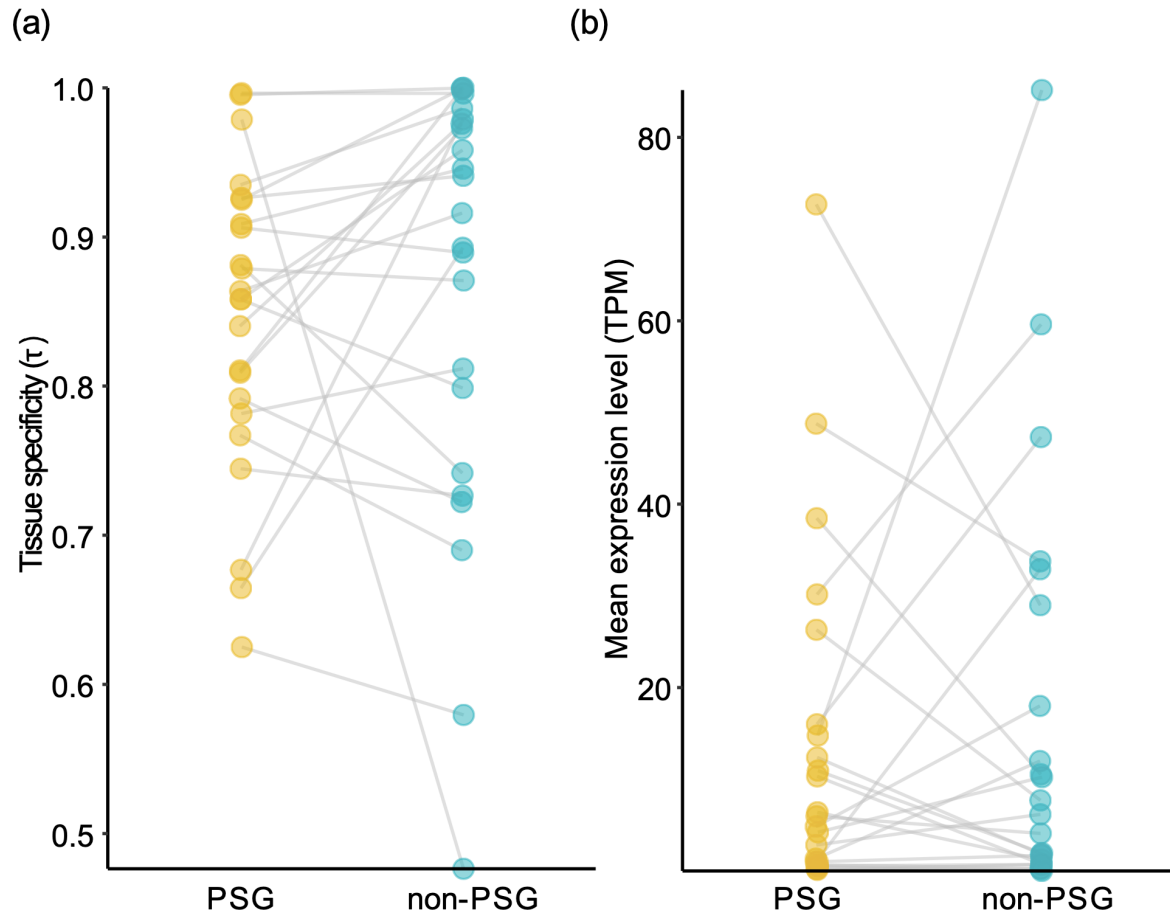

**Figure S3.** Comparison of the expression pattern between the PSGs and non-PSGs. (a) The comparison of tissue specificity between PSGs and non-PSGs. (b) The comparison of mean expression level across multiple tissues between PSGs and non-PSGs.

Table S1. The PSGs across seven great ape lineages.

Table S2. The comparison of the lifespan between great apes and other primates.

| Species                | Lifespan* | Source                                                                                                              |
|------------------------|-----------|---------------------------------------------------------------------------------------------------------------------|
| <i>Homo sapiens</i>    | 122.5     | The AnAge database                                                                                                  |
| <i>Pan troglodytes</i> | 59.4      | The AnAge database                                                                                                  |
| <i>Gorilla gorilla</i> | 60.1      | The AnAge database                                                                                                  |
| <i>Pongo abelii</i>    | 58        | <a href="https://animaldiversity.org/accounts/Pongo_abelii/">https://animaldiversity.org/accounts/Pongo_abelii/</a> |
| <i>Pongo pygmaeus</i>  | 59        | The AnAge database                                                                                                  |

\*The lifespan data of other 149 primates were downloaded from the AnAge database. To compare the lifespan between great ape and other primates, we performed bootstrap 1000 times and found the mean lifespan for great ape species was greater than other primates all the time.
